# Supplementary material for: Human CD141+ dendritic cells (cDC1) are impaired in patients with advanced melanoma but can be targeted to enhance anti-PD-1 in a humanized mouse model
Source: PubMed Central journal article supplement — J Immunother Cancer. 2021 Mar 18;9(3):e001963. doi: 10.1136/jitc-2020-001963 (PMC7978242; doi:10.1136/jitc-2020-001963), 2021-03-18
Supplement: jitc-2020-001963supp001.pdf [file jitc-2020-001963supp001.pdf]

Human CD141<sup>+</sup> DCs can be targeted to enhance anti-PD-1 efficacy in melanoma Supplementary Data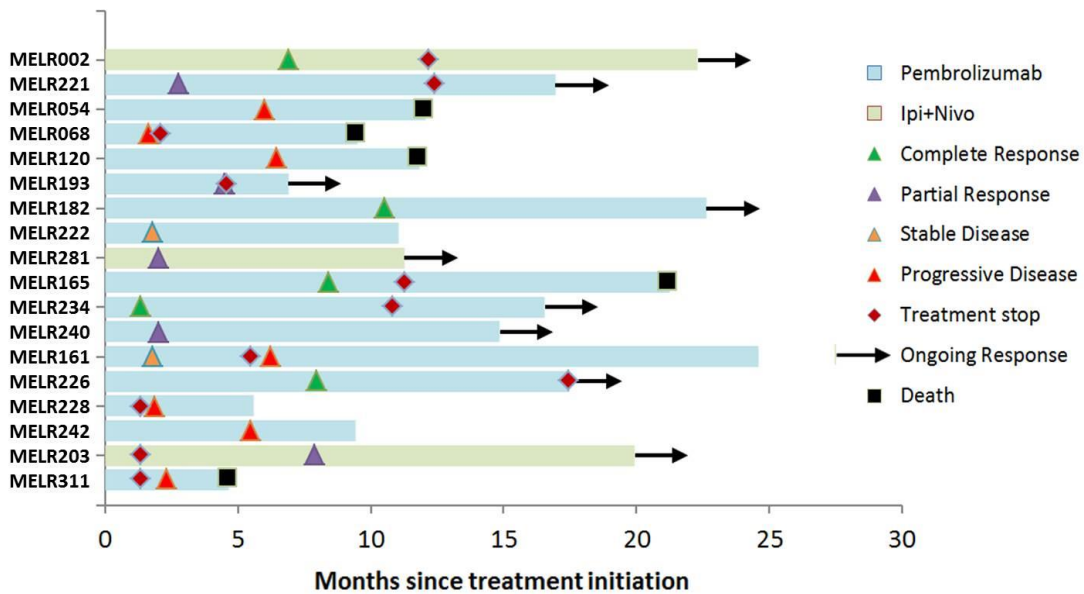

**Supplementary Figure 1: Swimmer's plot of advanced melanoma patients undergoing anti-PD-1 and/or anti-CTLA-4 immunotherapy**

Treatment type, duration of response, dates of complete/partial response or progressive disease, and presence of ongoing response or death are indicated accordingly.

Human CD141<sup>+</sup> DCs can be targeted to enhance anti-PD-1 efficacy in melanoma Supplementary Data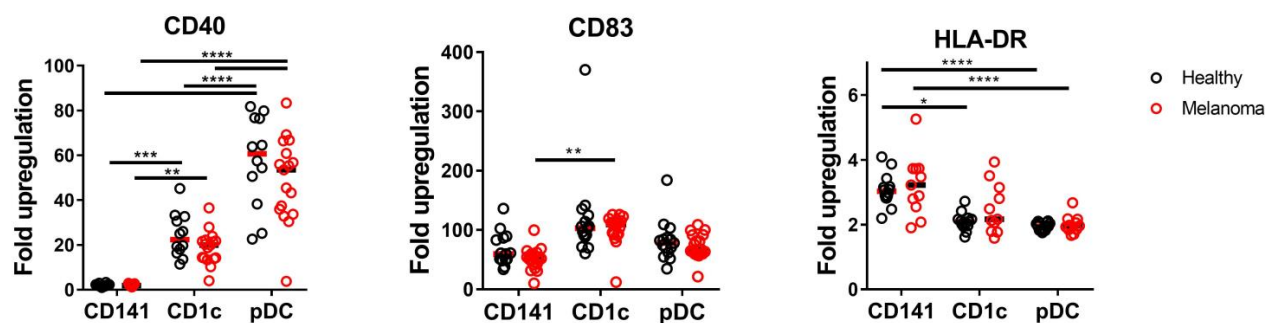**Supplementary Figure 2: Fold increase of costimulatory molecule expression of activated DC relative to non-activated**

Data shown is the Geometric Mean Fluorescence Intensity (gMFI) values (after FMO subtraction) of costimulatory molecules on DC subsets following ex vivo whole blood culture activation with PolyIC + R848 expressed as the fold increase relative to the matched untreated sample for each donor (healthy controls, n = 10-12, melanoma patients, n = 7-18). Median values are shown. \* p < 0.05, \*\* p < 0.01, \*\*\*\* p < 0.0001 by 2-way ANOVA.

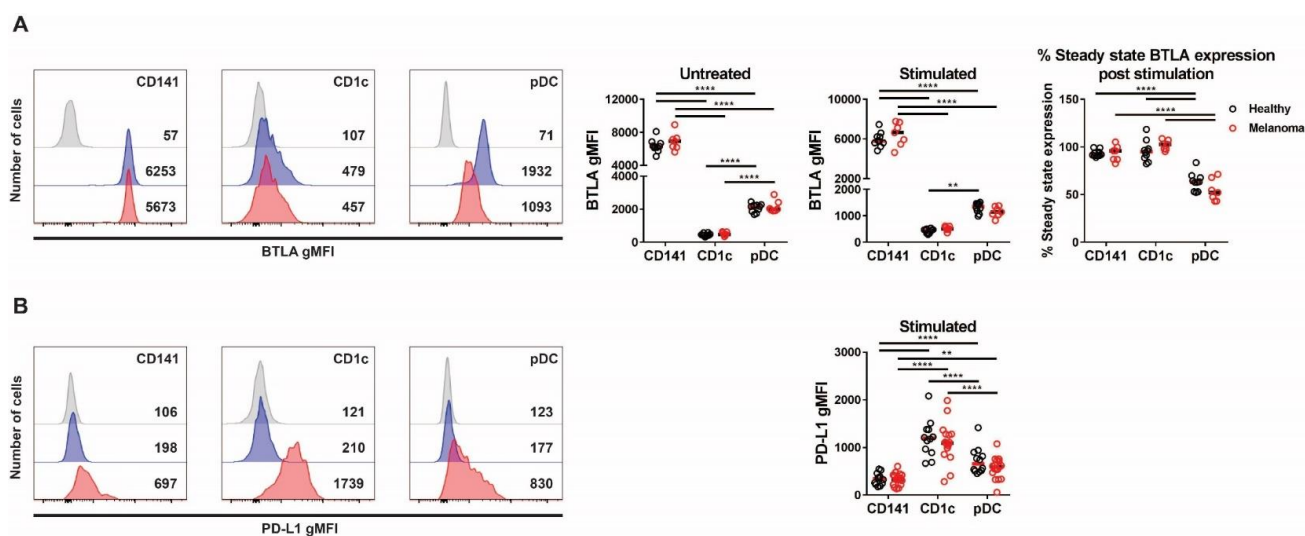**Supplementary Figure 3: BTLA and PD-L1 expression on DC subsets in advanced melanoma patients**

Expression of BTLA (A) and PD-L1 (B) by DC subsets from advanced (Stage 3/4) melanoma patients and healthy donor controls after ex vivo whole blood culture alone (untreated) or after activation with PolyIC + R848. Left panels: Representative histograms showing fluorescence minus one (FMO) control (grey), and marker expression on untreated (blue) or activated (red) DC subsets. Number represents geometric mean fluorescence intensity (gMFI) values. Right panels: Compiled background-subtracted gMFI of expression of each marker (healthy controls (black), n = 10-12, melanoma patients (red), n = 7-18). Median values are shown. \*\* p < 0.01, \*\*\*\* p < 0.0001 by 2-way ANOVA.

Human CD141<sup>+</sup> DCs can be targeted to enhance anti-PD-1 efficacy in melanoma Supplementary Data

A

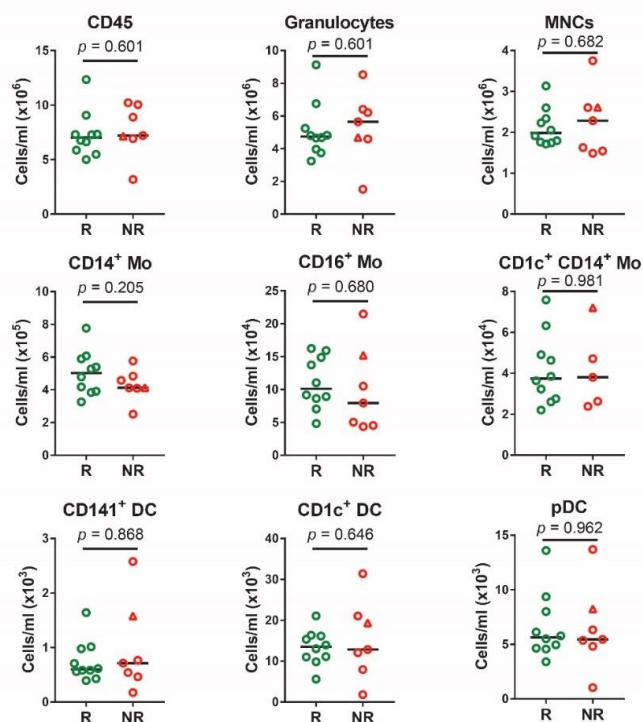

B

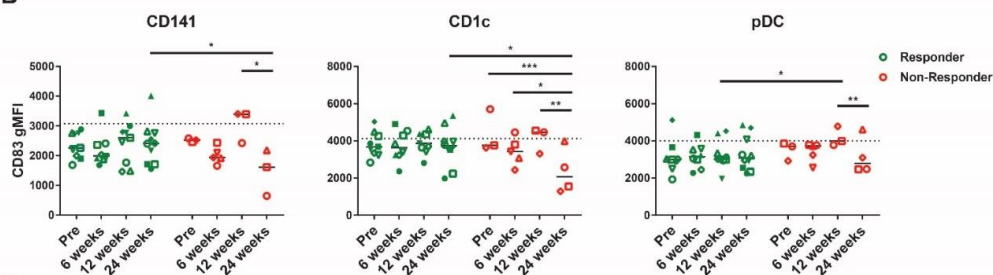

C

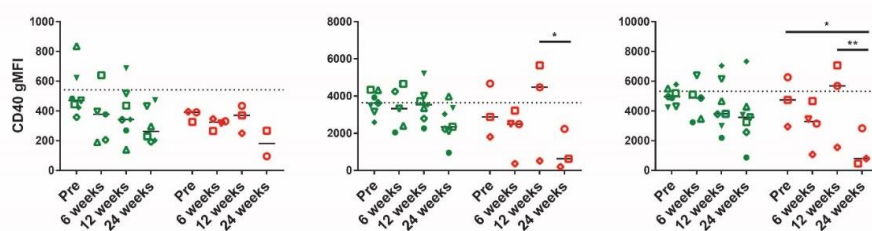**Supplementary Figure 4: DC numbers and activation in melanoma patients treated with immunotherapy.**

A. Numbers of leukocyte subsets in advanced melanoma patients prior to treatment with immunotherapy segregated into responders (R, green,  $n = 9-10$ ) and non-responders (NR, red,  $n = 5-7$ ). A patient in the NR group who had disease progression on anti-PD-1 alone was switched to anti-CTLA-4 alone and had stable disease, denoted in triangle. B. CD83 and C. CD40 expression on CD141<sup>+</sup> DCs, CD1c<sup>+</sup> DCs, and pDCs (left to right) post PolyIC and R848 stimulation in advanced melanoma patients prior (Pre) and during immunotherapy at the indicated time points. CD83:  $n = 6-10$  responders,  $n = 3-5$  non-responders; CD40:  $n = 4-7$  responders,  $n = 2-4$  non-responders). gMFI, geometric mean fluorescence intensity. Dotted lines represent median values of marker expression based on healthy controls. Each symbol represents an individual patient.

Human CD141<sup>+</sup> DCs can be targeted to enhance anti-PD-1 efficacy in melanoma Supplementary Data**A Untreated**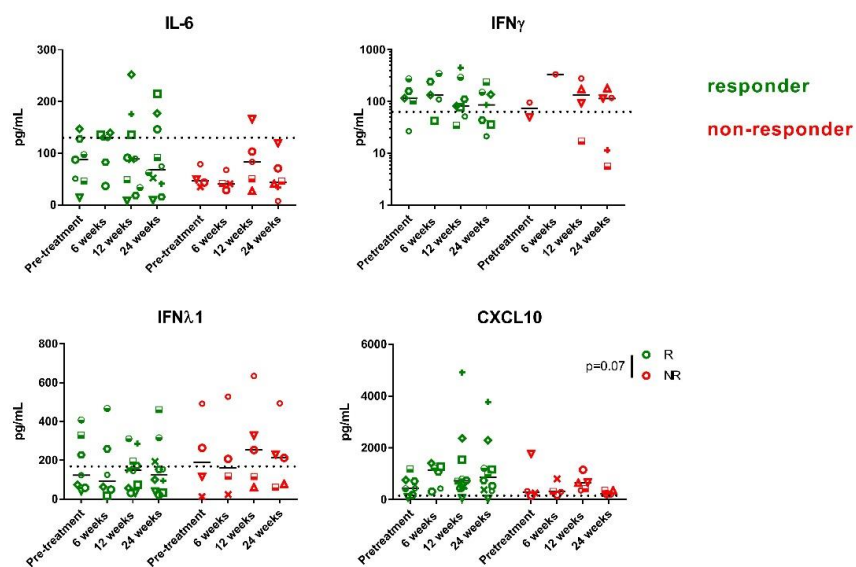**B Stimulated**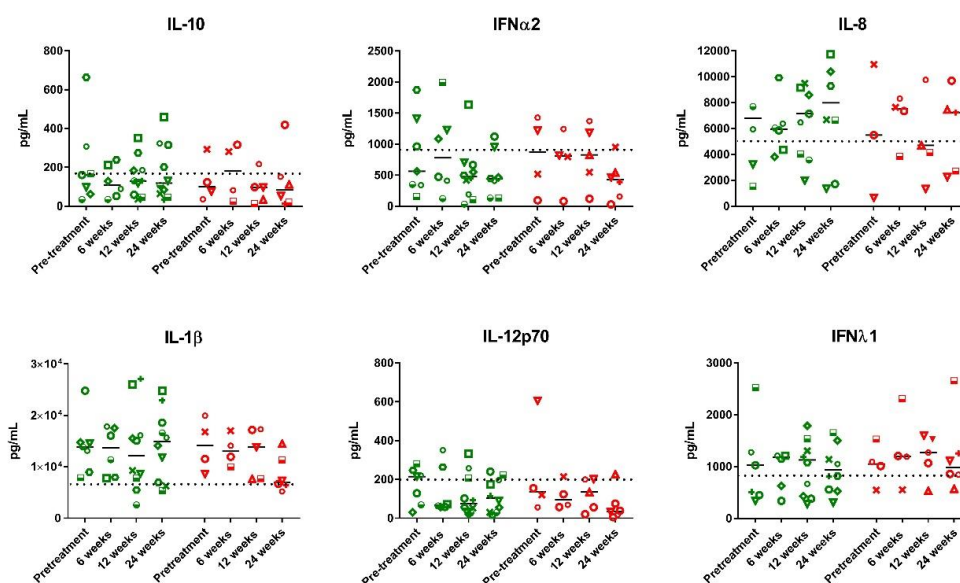**Supplementary Figure 5: Cytokine production in melanoma patients treated with immunotherapy.**

Plasma cytokines in advanced melanoma patients prior (Pretreatment) and during immunotherapy at the indicated time points, segregated into responders (R, green,  $n = 4-10$ ) and non responders (NR, red,  $n=4-6$ ). A. Plasma IL-6, IFN $\gamma$ , IFN $\lambda$ 1 and CXCL10 in the absence of stimulation. B. Plasma IL-10, IFN $\alpha$ 2, IL-8, IL-1 $\beta$ , IL-12p70 and IFN $\lambda$ 1 post stimulation with PolyIC + R848. Median values are shown with Bars representing median, dotted lines indicate median healthy donor levels. Statistical significance assessed using 2-way ANOVA. No significant differences were found between responders and non-responders at any time points.

Human CD141<sup>+</sup> DCs can be targeted to enhance anti-PD-1 efficacy in melanoma Supplementary Data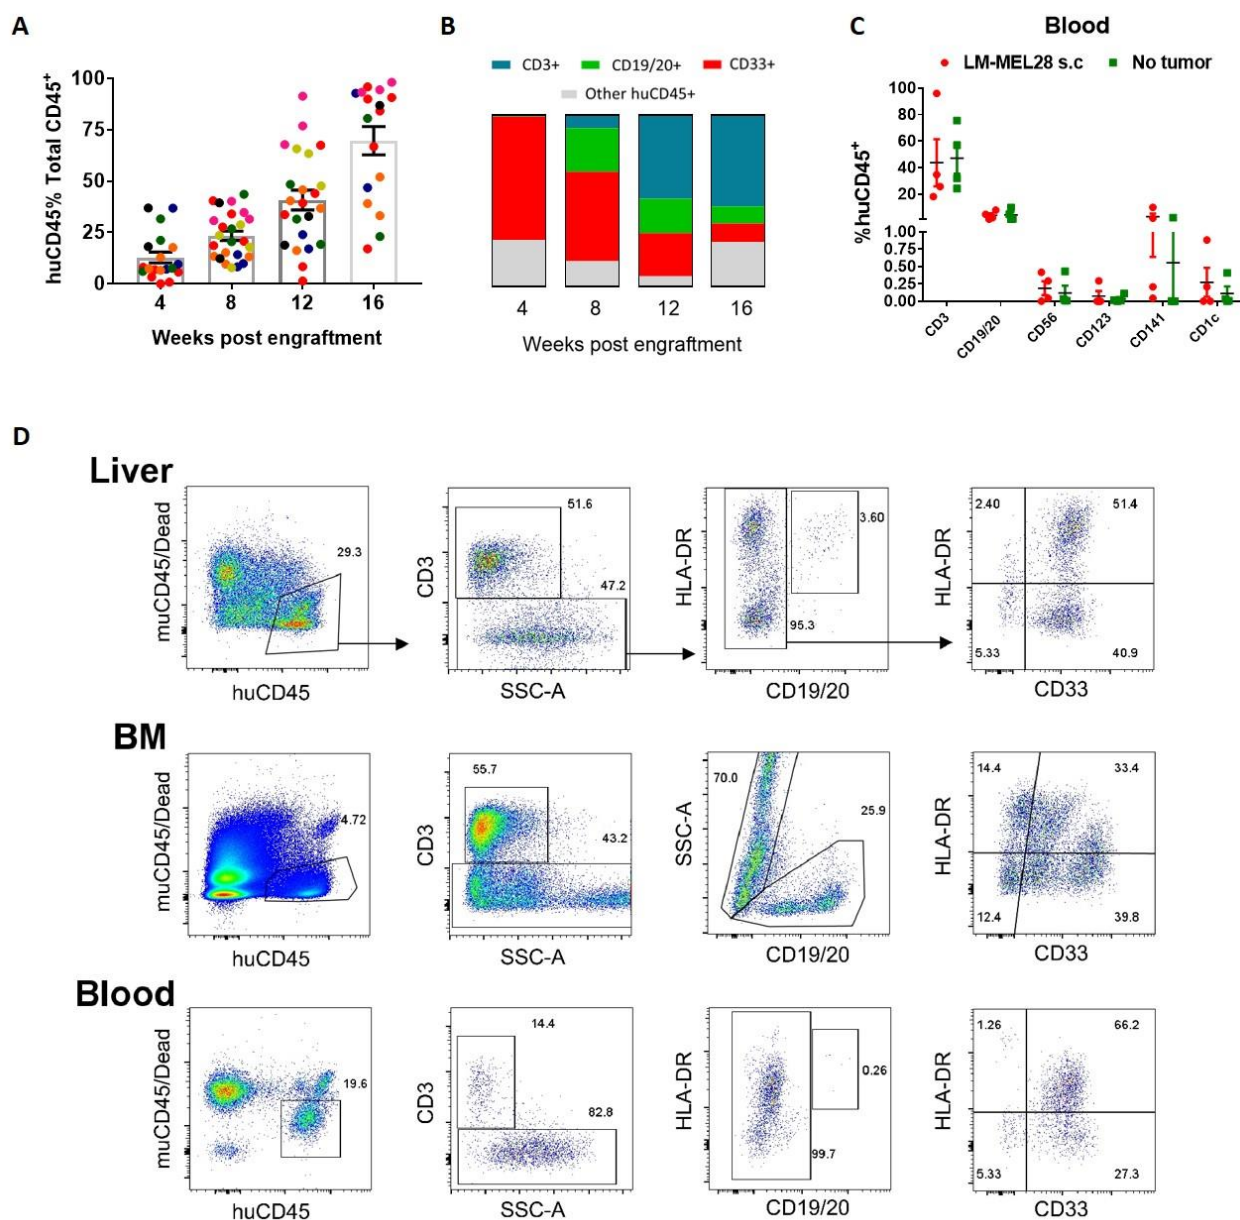**Supplementary Figure 6: Human immune reconstitution in NSG-SGM3 mice.**

A. Percentage of human CD45<sup>+</sup> cells among total peripheral blood CD45<sup>+</sup> cells of non-tumour-bearing NSG-SGM3 mice injected with CD34<sup>+</sup> HSCs 2-5 days post-partum. Blood was analyzed every 4 weeks by flow cytometry. Symbols depict individual mice and colours denote mice engrafted with the same human CD34<sup>+</sup> HSC sample (n = 5-7 HSC donors and 19-25 mice per time point). B. Proportions of CD3, CD19/20, CD33 lineages within human CD45 compartment of blood for mice shown in (A). C. Percentage of each immune subset of total huCD45<sup>+</sup> cells in blood of tumor and non-tumor bearing huNSG-SGM3 mice at 12-16 weeks post-enugraftment. Tumour-bearing mice culled at day 35. Human CD34<sup>+</sup> cell donors were split evenly between tumor and non-tumor bearing littermates. D. Human immune reconstitution in liver, bone marrow and blood of NSG-SGM3 mice 8-16 weeks post-enugraftment.



Human CD141<sup>+</sup> DCs can be targeted to enhance anti-PD-1 efficacy in melanoma Supplementary Data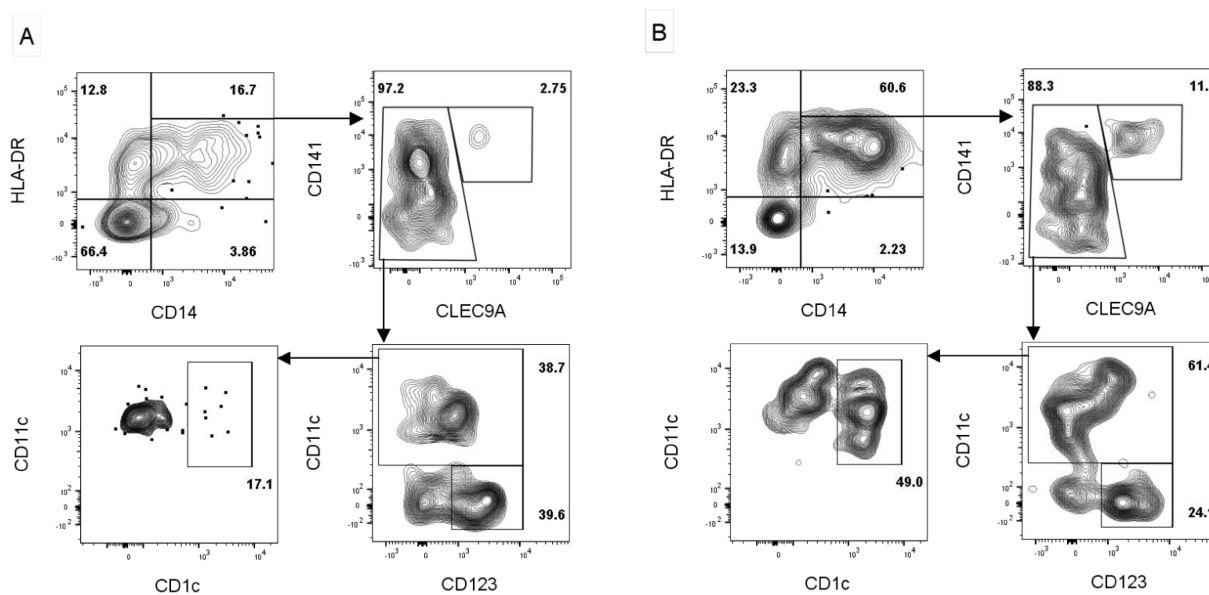**Supplementary Figure 7: Detection of DC subsets in melanoma tumors of humanized mice.**

A. CD141<sup>+</sup> (CD141<sup>+</sup>Clec9A<sup>+</sup>), CD1c<sup>+</sup> (CD11c<sup>+</sup>CD1c<sup>+</sup>), and pDCs (CD11c<sup>+</sup>CD123<sup>+</sup>) within the human CD45<sup>+</sup> leukocyte compartment of a vehicle treated LM-MEL28 tumor in humanized mice. DC were not detected in 3 of 4 tumors in the control group. B. DC subsets infiltrating tumors in Flt3L+PIC treated mice. Representative of 2 mice, DC were undetectable in another 2 treated mice. Tumors were harvested 10 days after the first Flt3L treatment (day 19 after tumor injection). Numbers near gates refer to percentage of parent population. Cells were pre-gated on muCD45<sup>-</sup>/Live/huCD45<sup>+</sup>/CD3<sup>-</sup>/CD19<sup>-</sup>/20<sup>-</sup> events.

Human CD141<sup>+</sup> DCs can be targeted to enhance anti-PD-1 efficacy in melanoma Supplementary Data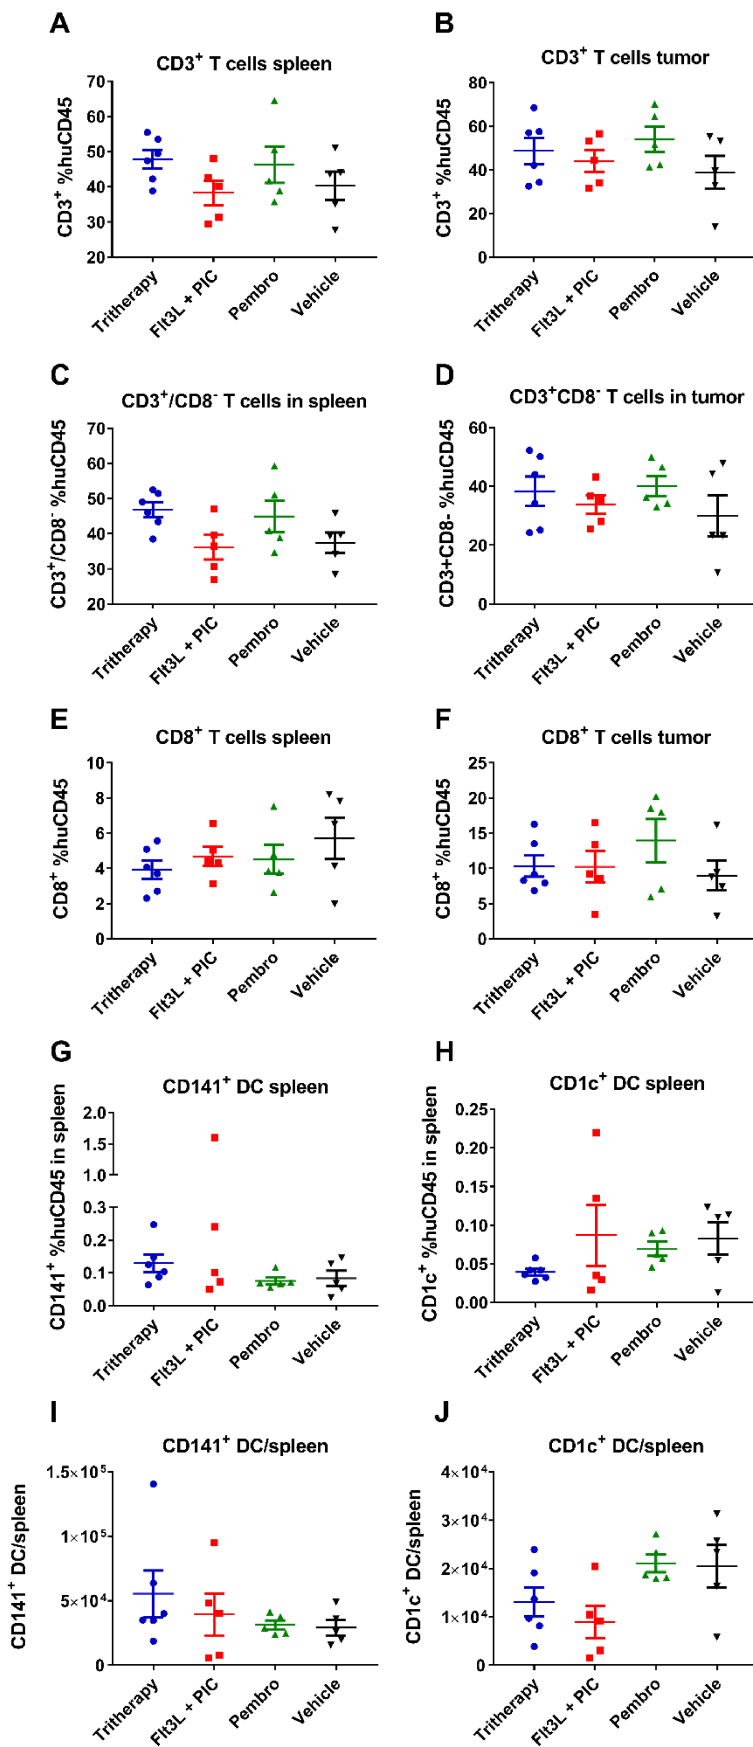

Human CD141<sup>+</sup> DCs can be targeted to enhance anti-PD-1 efficacy in melanoma Supplementary Data

**Supplementary Figure 8: Human T cells and DCs in spleens and tumors of humanized NSG-SGM3 treated with immunotherapy.**

A-F. Percentage of CD3<sup>+</sup> cells (A, B), CD3<sup>+</sup>/CD8<sup>-</sup> T cells (C, D), and CD3<sup>+</sup> /CD8<sup>+</sup> T cells (E, F) within the human CD45<sup>+</sup> compartment in spleens (A, C and E) and subcutaneous LM-MEL28 tumors (B, D and F) from humanized NSG-SGM3 mice treated with indicated regimen. G-H. Percentage of CD141<sup>+</sup> DCs (G) or CD1c<sup>+</sup> DCs (H), among human CD45<sup>+</sup> cells in spleens of mice. I-J. Total number of CD141<sup>+</sup> and CD1c<sup>+</sup> DCs per spleen of NSG-SGM3 mice. n = 5-6 mice per group.

**Supplementary Table 1. Demographic and clinical characteristics of advanced melanoma patients (7th edition of the American Joint Committee on Cancer (AJCC) staging manual [1]) and healthy donor controls.**

N/A: Not applicable.

| Characteristic                 | Patients     | Controls     |
|--------------------------------|--------------|--------------|
| Sex – no. (%)                  |              |              |
| Male                           | 39 (73.6)    | 13 (52.0)    |
| Female                         | 14 (26.4)    | 12 (48.0)    |
| Median age (range) – year      | 61 (26 – 87) | 52 (30 – 63) |
| Disease stage – no. (%)        |              |              |
| 3                              | 32 (60.4)    | N/A          |
| 4                              | 21 (39.6)    | N/A          |
| BRAF mutation status – no. (%) |              |              |
| Wild type                      | 23 (43.4)    | N/A          |
| V600E or V600K mutation        | 14 (26.4)    | N/A          |
| Unknown                        | 16 (30.2)    | N/A          |
| Previous treatment – no. (%)   |              |              |
| Surgery                        | 19 (35.8)    | N/A          |
| Wide local excision            | 16 (30.2)    | N/A          |
| Nodal                          | 2 (3.8)      | N/A          |
| Axillary                       | 1 (1.9)      | N/A          |
| Radiation                      | 9 (17.0)     | N/A          |
| Systemic therapy               | 1 (1.9)      | N/A          |

1. Balch, C.M., et al., *Final version of 2009 AJCC melanoma staging and classification*. J Clin Oncol, 2009. **27**(36): p. 6199-206.



Human CD141<sup>+</sup> DCs can be targeted to enhance anti-PD-1 efficacy in melanoma Supplementary Data

**Supplementary Table 2. Patient characteristics (immunotherapy).**

| Patient ID | Sex | Age | Stage | Treatment              | Best response | Prior treatment            |
|------------|-----|-----|-------|------------------------|---------------|----------------------------|
| MELR161    | M   | 68  | 4     | Pembrolizumab          | SD            |                            |
| MELR165    | F   | 66  | 4     | Pembrolizumab          | CR            | Surgery                    |
| MELR120    | M   | 53  | 4     | Pembrolizumab          | PD            | Surgery,<br>Radiation      |
| MELR002    | M   | 64  | 4     | Ipilimumab + Nivolumab | CR            |                            |
| MELR182    | M   | 78  | 4     | Pembrolizumab          | CR            |                            |
| MELR054    | M   | 54  | 4     | Pembrolizumab          | PD            | Radiation                  |
| MELR203    | F   | 57  | 4     | Ipilimumab + Nivolumab | PR            |                            |
| MELR068    | M   | 38  | 4     | Pembrolizumab          | PD            | Surgery,<br>Radiation      |
| MELR226    | M   | 63  | 4     | Pembrolizumab          | PR            |                            |
| MELR234    | F   | 53  | 4     | Pembrolizumab          | CR            |                            |
| MELR221    | M   | 49  | 4     | Pembrolizumab          | PR            |                            |
| MELR240    | M   | 77  | 4     | Pembrolizumab          | PR            |                            |
| MELR222    | F   | 57  | 3*    | Pembrolizumab          | SD            | Radiation                  |
| MELR281    | M   | 66  | 4     | Ipilimumab + Nivolumab | PR            |                            |
| MELR242    | M   | 45  | 4     | Pembrolizumab          | PD            | Radiation                  |
| MELR193    | F   | 86  | 4     | Pembrolizumab          | PR            |                            |
| MELR311    | F   | 74  | 4     | Pembrolizumab          | PD            |                            |
| MELR228    | F   | 61  | 4     | Pembrolizumab          | PD            | Radiation,<br>BRAFi + MEKi |

Patients were treated intravenously with anti-PD-1 (Pembrolizumab, Keytruda®) monotherapy (2mg/kg every 3 weeks), anti-CTLA-4 (Ipilimumab, Yervoy®) monotherapy (3mg/kg every 3 weeks), or anti-PD-1 (Nivolumab, Opdivo®) (1mg/kg every 3 weeks) and anti-CTLA-4 Ipilimumab in combination (3mg/kg every 3 weeks), followed by maintenance Nivolumab at 3mg/kg every 2 weeks. Treatment was allowed to continue unless disease progression or unacceptable toxicity occurred, or at patient decision to stop treatment on complete response. ID: De-identified patient identity. Sex: M, male; F, female. Best response: CR, complete response; PR, partial response; SD, stable disease; PD, progressive disease. BRAFi, BRAF inhibitor. MEKi, MEK inhibitor. \* MELR222 is a patient with unresectable stage 3C melanoma.
